# Supplementary material for: Nobiletin enhances the efficacy of chemotherapeutic agents in ABCB1 overexpression cancer cells
Source: PubMed Central journal article supplement (PMC4686932; doi:10.1038/srep18789), 2015-12-22
Supplement: srep18789-s1.pdf [file srep18789-s1.pdf]

# Nobiletin enhances the efficacy of chemotherapeutic agents in ABCB1 overexpression cancer cells

Wenzhe Ma, Senling Feng, Xiaojun Yao, Zhongwen Yuan, Liang Liu, Ying Xie\*

## Supplementary Information

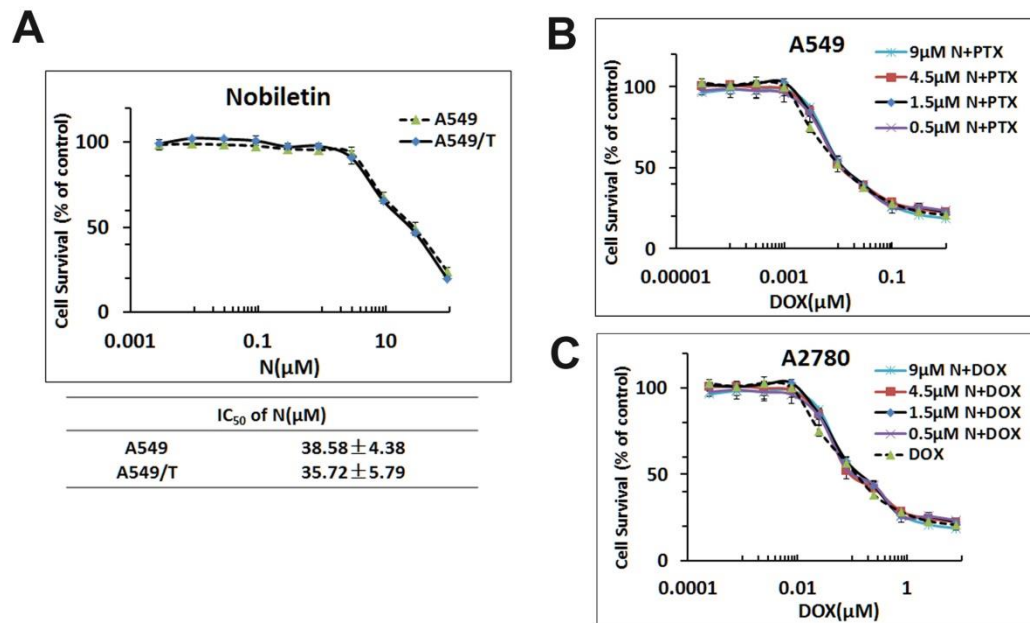

**Supplementary Figure S1. Nobiletin have no reversal effect on the paclitaxel sensitivity cells.** (A) Cytotoxicity of nobiletin alone in pairs of A2549/T or A549 cells. Nobiletin did not affect the IC<sub>50</sub> of paclitaxel in sensitive cancer cells A2780 (B) and A549 (C). Cells were treated with the indicated drugs for 48 hours and subjected to SRB assay. \*\*, P<0.01., \*\*\*, P<0.001., Student's t-test (n = 3) or one-way ANOVA (n = 3).

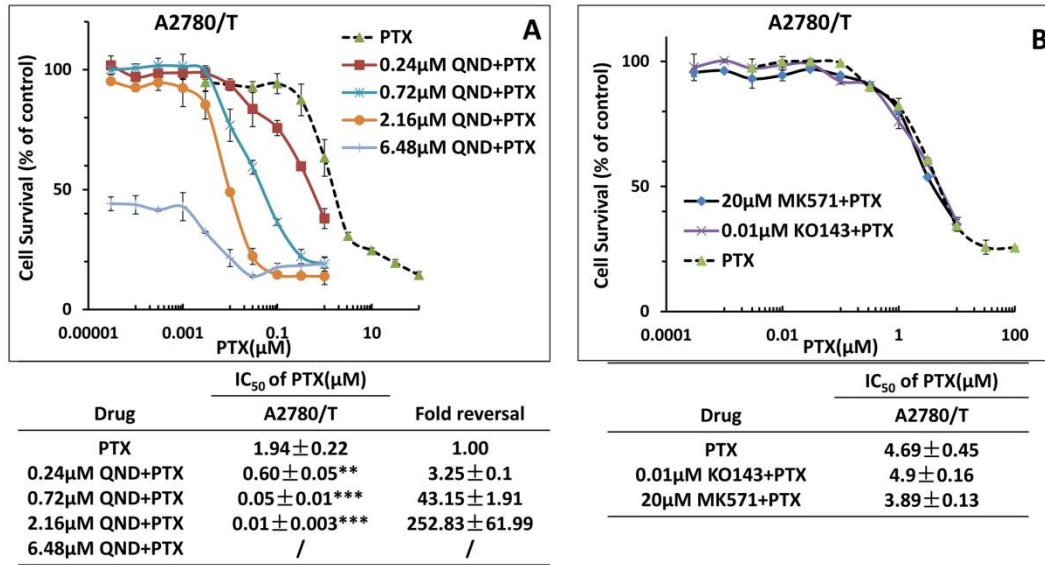

**Supplementary Figure S2. The effect of transporter inhibitor on the paclitaxel sensitivity of resistant cells. (A)** Quinidine (MDR1 inhibitor) but not **(B)** MK571(MRPs inhibitor) or KO143 (BCRP inhibitor) reduces the IC<sub>50</sub> of paclitaxel in resistant cancer cells A2780/T. Cells were treated with the indicated drugs for 48 hours and subjected to SRB assay. \*\*, P<0.01., \*\*\*, P<0.001., Student's t-test (n = 3) or one-way ANOVA (n = 3).

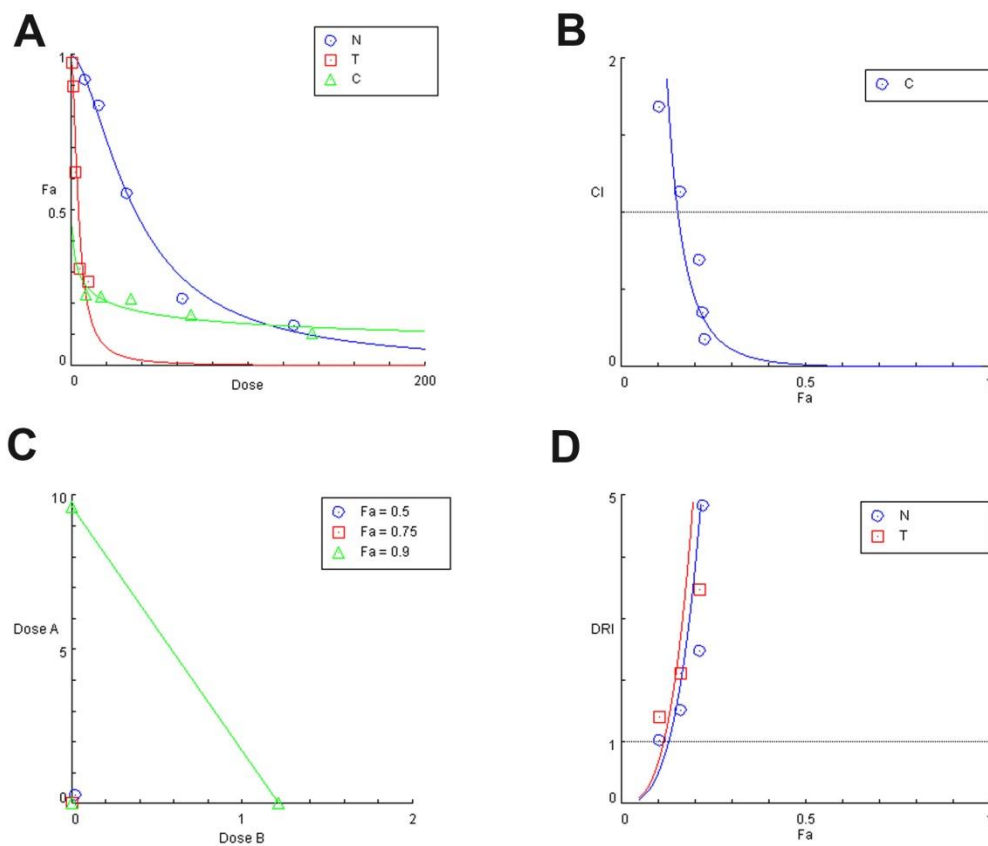

**Supplementary Figure S3. The quantitative diagnostic graphics for the synergistic effect between nobiletin (N) and paclitaxel (T) generated by the computer simulation. (A), the fraction affected (Fa)-Dose plot for nobiletin (N), paclitaxel (T) and combination (C). (B), the Fa-CI plot (Chou-Talalay plot). (C), the classic isobologram. (D), the Fa-DRI plot (Chou-Martin plot) for the constant ratio combination design.  $CI < 1$ , Synergism;  $CI = 1$ , Additive;  $CI > 1$ , Antagonism.  $DRI > 1$ , Reduced dose and reduce Toxicity.**

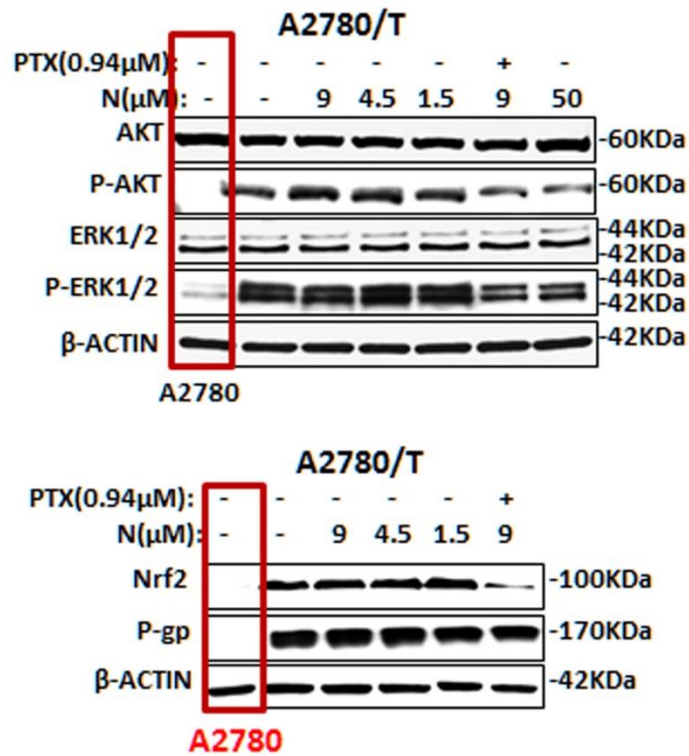

**Supplementary Figure S4. Effects of nobiletin alone on ABCB1 expression and AKT/ERK/Nrf2 pathway.** Equal amounts of total lysate were loaded and detected by Western blot. Nobiletin alone did not influence ABCB1, Nrf2, total and phosphorylation of AKT/ERK expression levels.

**Supplementary Table S1** Nobiletin reverses the ABCB1-mediated drug resistance to Paclitaxel, 5-fluorouracil, docetaxel and doxorubicin in A549/T cells.

| A549/T         |                     |                  |
|----------------|---------------------|------------------|
| Drug           | IC50( $\mu$ M)      | Fold reversal    |
| Paclitaxel     | 1.89 $\pm$ 0.15     | 1.00             |
| +0.5 $\mu$ M N | 0.75 $\pm$ 0.06*    | 2.51 $\pm$ 0.01  |
| +1.5 $\mu$ M N | 0.34 $\pm$ 0.02**   | 5.65 $\pm$ 0.8   |
| +4.5 $\mu$ M N | 0.09 $\pm$ 0.01***  | 22.33 $\pm$ 3.6  |
| +9 $\mu$ M N   | 0.03 $\pm$ 0.004*** | 62.88 $\pm$ 0.98 |
| Docetaxel      | 13.36 $\pm$ 1.09    | 1.00             |
| +0.5 $\mu$ M N | 8.43 $\pm$ 0.69*    | 1.59 $\pm$ 0.01  |
| +1.5 $\mu$ M N | 2.67 $\pm$ 0.22**   | 5.05 $\pm$ 0.82  |
| +4.5 $\mu$ M N | 0.71 $\pm$ 0.11**   | 19.18 $\pm$ 4.59 |
| Doxorubicin    | 5.97 $\pm$ 0.49     | 1.00             |
| +0.5 $\mu$ M N | 4.23 $\pm$ 0.35     | 1.42 $\pm$ 0.23  |
| +1.5 $\mu$ M N | 2.67 $\pm$ 0.22*    | 2.25 $\pm$ 0.37  |
| +4.5 $\mu$ M N | 1.19 $\pm$ 0.10**   | 5.01 $\pm$ 0.01  |
| Daunorubicin   | 10.07 $\pm$ 1.63    | 1.00             |
| +0.5 $\mu$ M N | 5.97 $\pm$ 0.49*    | 1.68 $\pm$ 0.14  |
| +1.5 $\mu$ M N | 2.84 $\pm$ 0.46*    | 3.55 $\pm$ 0.01  |
| +4.5 $\mu$ M N | 0.71 $\pm$ 0.13**   | 14.17 $\pm$ 0.04 |
| 5-Fluorouracil | 133.57 $\pm$ 10.86  | 1.00             |
| +0.5 $\mu$ M N | 106.10 $\pm$ 8.63   | 1.26 $\pm$ 0.01  |
| +1.5 $\mu$ M N | 66.95 $\pm$ 5.44*   | 1.99 $\pm$ 0.01  |
| +4.5 $\mu$ M N | 16.82 $\pm$ 1.36**  | 7.94 $\pm$ 0.02  |

Cell growth was determined using the SRB assay. The data are representative of three different experiments and are shown as mean  $\pm$  SD (n = 3). \*, P<0.05, \*\*, P<0.01, \*\*\*, P<0.001, means significantly different from the control group in the absence of nobiletin.

**Supplementary Table S2** The calculated CI for combination of nobiletin and paclitaxel as well as the simulated synergism dose at Fa 0.5 (ED<sub>50</sub>)

| Data for Fa = 0.5 | CI value | Dose N( $\mu$ M) | Dose PTX( $\mu$ M) |
|-------------------|----------|------------------|--------------------|
| N                 |          | 35.9574          |                    |
| PTX               |          |                  | 4.20446            |
| N+PTX             | 0.01334  | 0.28572          | 0.02268            |

CI analyses of the effects of nobiletin in combination with paclitaxel are shown. The CI values were plotted as a function of the particular inhibitory effect. CI values <1 represent a synergistic combination, CI values equal to 1 are additive and CI values >1 represent antagonistic combinations. We conclude from the table that PTX was significantly reduced in nobiletin treated A2780/T cells.

**Supplementary Table S3** The cellular concentration of nobiletin in A2780/T cells after treatment with single nobiletin or in combination of PTX 48hours (n=3).

| Group                     | N Conc. ( $\bar{X} \pm S.D.$<br>ng/mg protein) * |
|---------------------------|--------------------------------------------------|
| 4.5 $\mu$ M N             | 44.87 $\pm$ 2.57                                 |
| 4.5 $\mu$ M N+ Paclitaxel | 92.86 $\pm$ 7.96                                 |
| 9 $\mu$ M N               | 82.28 $\pm$ 2.36                                 |
| 9 $\mu$ M N+ Paclitaxel   | 118.41 $\pm$ 4.06                                |
| 25 $\mu$ M N              | 138.01 $\pm$ 5.73                                |
| 50 $\mu$ M N              | 315.69 $\pm$ 3.12                                |

\*Final intracellular concentration of nobiletin was expressed as  $\bar{X} \pm S.D.$  ng/mg protein (n=3).
