# Supplementary material for: Nobiletin enhances the efficacy of chemotherapeutic agents in ABCB1 overexpression cancer cells
Source: PubMed Central journal article supplement (PMC4686932; doi:10.1038/srep18789), 2015-12-22

# Nobiletin enhances the efficacy of chemotherapeutic agents in ABCB1 overexpression cancer cells

Wenzhe Ma, Senling Feng, Xiaojun Yao, Zhongwen Yuan, Liang Liu, Ying Xie\*

**Supplementary Figure Legends** Full-length blots for Figures 4B, 4C, and supplementary figure S4.

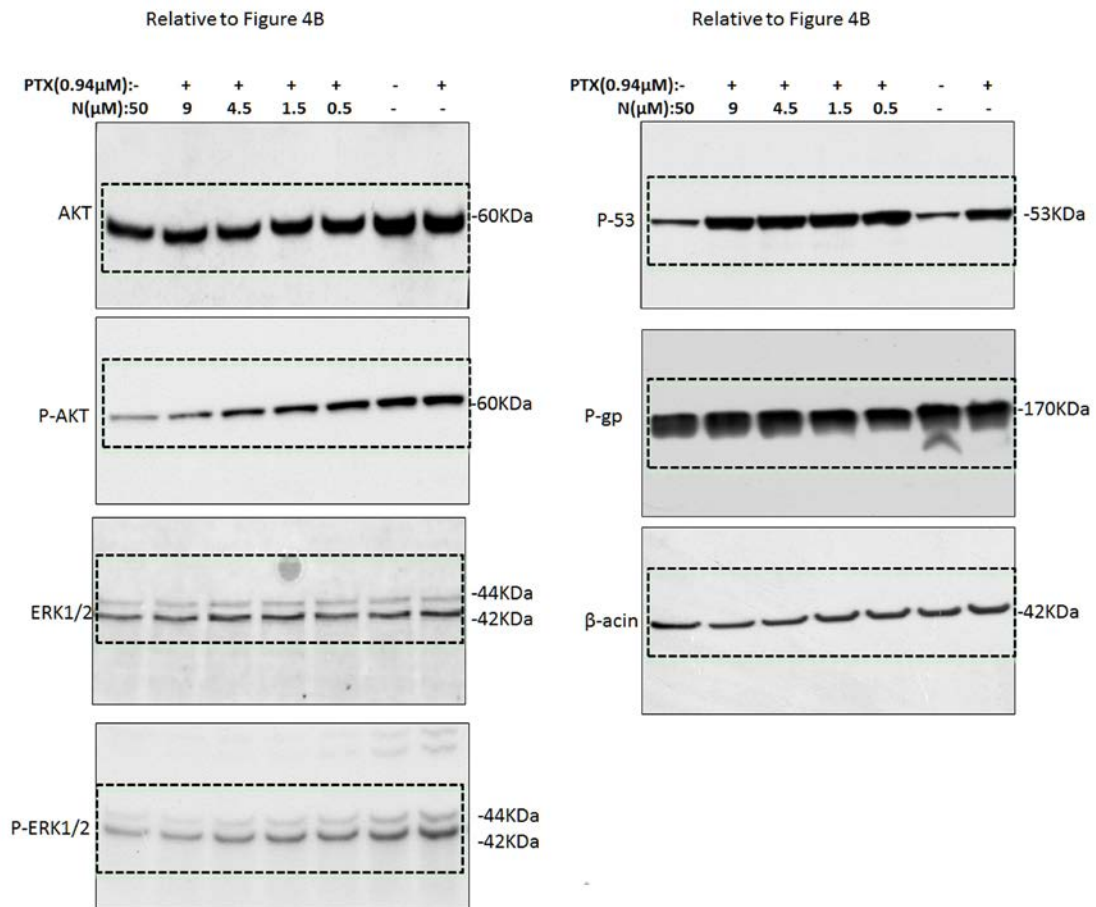

Supplementary Figure 4C

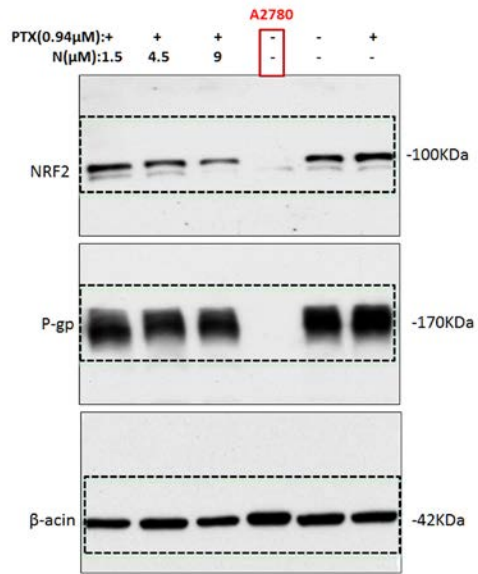

Relative to Supplementary Figure S4

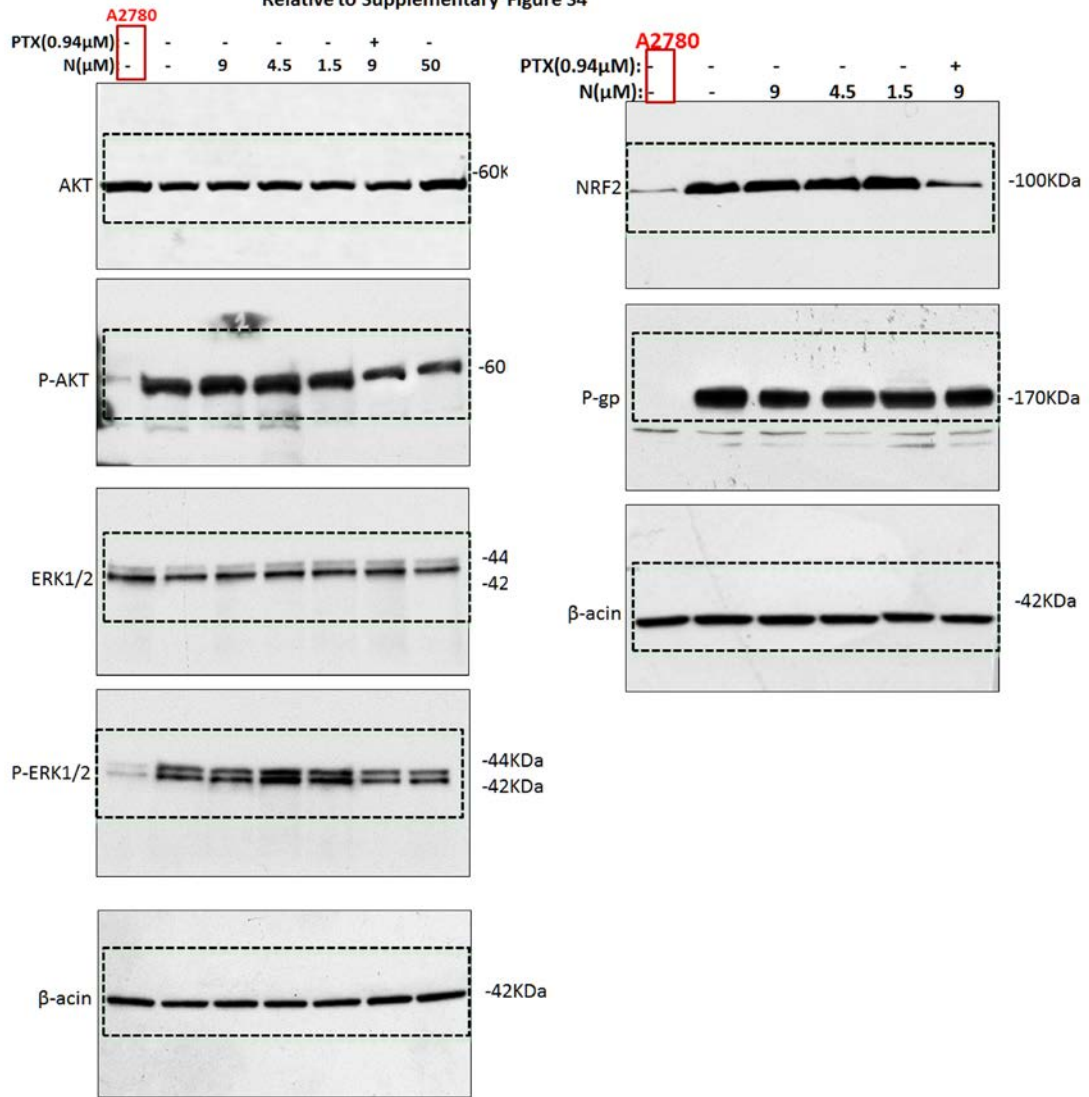

Supplement: srep18789-s2.pdf [file srep18789-s2.pdf]
